# Supplementary material for: Fe-doped Ni3S2/NiS heterojunction with improved electrocatalytic activity and stability for the alkaline oxygen evolution reaction
Source: Royal Society of Chemistry journal article supplement (doi:10.1039/d4qi02957g), 2025-01-01
Supplement: d4qi02957g1.pdf [file d4qi02957g1.pdf]

## Supporting Information

### Fe-doped Ni<sub>3</sub>S<sub>2</sub>/NiS heterojunction with improved electrocatalytic activity and stability for alkaline oxygen evolution reaction

Jiening Sun,<sup>a</sup> Licheng Miao<sup>\*b</sup>, Zhichuan J.Xu<sup>c</sup>, and Zhipeng Sun<sup>\*a b</sup>

<sup>a</sup> School of Materials and Energy, Guangdong University of Technology, Guangzhou, 510006, Guangdong, China. zpsunxj@gdut.edu.cn (Z. Sun).

<sup>b</sup> Key Laboratory of Advanced Energy Materials Chemistry (Ministry of Education), College of Chemistry, Nankai University, Tianjin 300071, China, miaolicheng@126.com.

<sup>c</sup> School of Material Science and Engineering, Nanyang Technological University, Singapore, 639798, Singapore.

#### 1. Computational details

Density functional theory (DFT) calculations were conducted using the Vienna Ab Initio Simulation Package (VASP).<sup>1</sup> The electron-ion and electron-electron interactions were modeled with projector-augmented wave (PAW) pseudopotentials and Perdew-Burke-Ernzerhof (PBE) exchange and correlation functionals, respectively.<sup>2,3</sup> A 4×3×1 k-point grid and an energy cut-off of 450 eV were utilized in all computations. Energy convergence was set at 10<sup>-5</sup> eV and the atomic force criterion at 0.02 eV Å<sup>-1</sup> to ensure full relaxation of atomic positions. A 20 Å vacuum layer was included between the two sheets to prevent interlayer interactions. Spin-polarized calculations were employed for all systems. Solvation effects were accounted for using an implicit solvation model, VASPsol, with default settings of 78.4 for the dielectric constant, 0.6 for the width of the dielectric cavity, and 0.525 meV Å<sup>-2</sup> for the dielectric cavity surface tension.<sup>4</sup> Free energy corrections for intermediate species were carried out with VASPKIT.<sup>5</sup> The free energy of gas-phase O<sub>2</sub> (G[O<sub>2</sub>]) was derived from

$$G[\text{O}_2] = 4.92(\text{eV}) + 2G[\text{H}_2\text{O}] - 2G[\text{H}_2]$$

by using the experimental Gibbs free energy of the reaction 2H<sub>2</sub>O(l) → O<sub>2</sub>(g) + 2H<sub>2</sub>(g) in standard conditions. Visualization and analysis of the figures were conducted using VESTA.

#### 2. Materials preparation

Weigh 5 mg of RuO<sub>2</sub> to form a uniform ink with Nafion binder and 980 μL of

dispersant (isopropanol to water ratio of 9:1).<sup>6</sup> The obtained suspension was sonicated for 30 min to obtain a uniform ink. Then apply it on foam nickel and place it for 12h to dry the working electrode. The test area is 0.5 cm<sup>2</sup> and the load capacity is 4.3 mg cm<sup>-2</sup>.

### 3. Material characterization

The crystal structure of the difference catalyst was characterized by an X-ray diffractometer (XRD, Ultima-IV, Cu K $\alpha$  radiation) with the 2 $\theta$  ranges from 10° to 80° at a scanning rate of 10°/min. SEM (SU8010) and TEM characterized the catalyst's microstructure and element composition. The X-ray photoelectron spectroscopy (XPS) was recorded on a Thermo Scientific Nexsa with an Al K $\alpha$  source. The nickel foam was cut to 5 mm  $\times$  5 mm without any special surface treatment. The XPS spectrums were analyzed and fitted by Themo Avantage software. All the tested binding energies were calibrated to 284.8 eV of the C1s carbon peak.

### 4. Supporting Figures and Tables

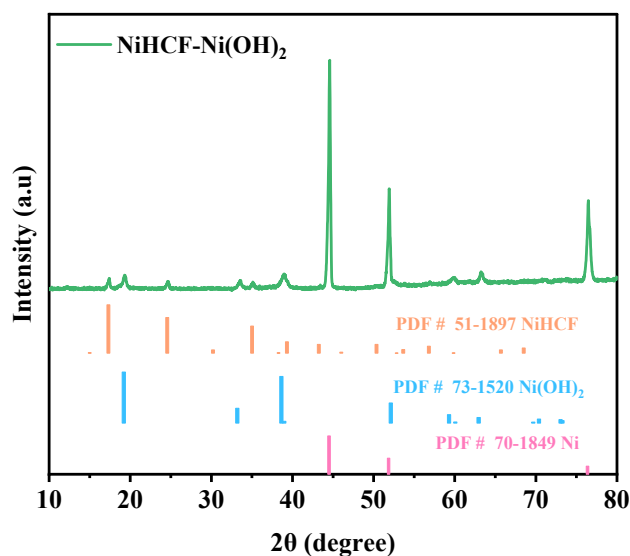

**Fig. S1** XRD pattern of NiHCF-Ni(OH)<sub>2</sub>.

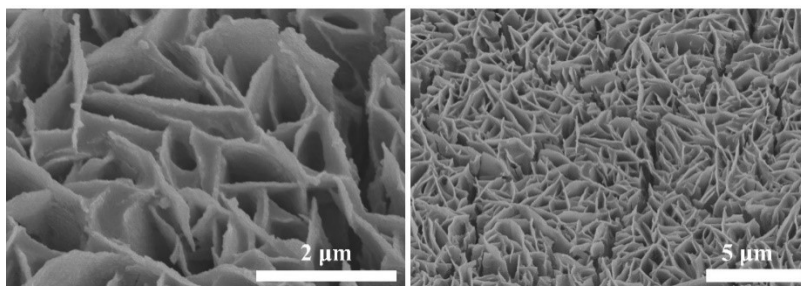

**Fig. S2** The SEM of Ni<sub>3</sub>S<sub>2</sub>/NiS.

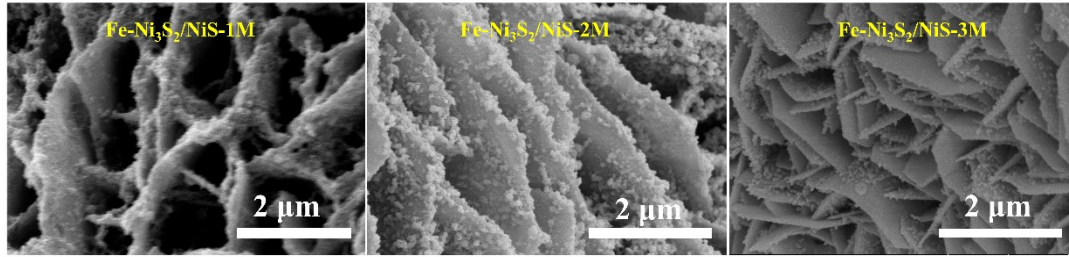

**Fig. S3** The SEM of different  $\text{Na}_2\text{S}$  concentrations in  $\text{Fe-Ni}_3\text{S}_2/\text{NiS}$ .

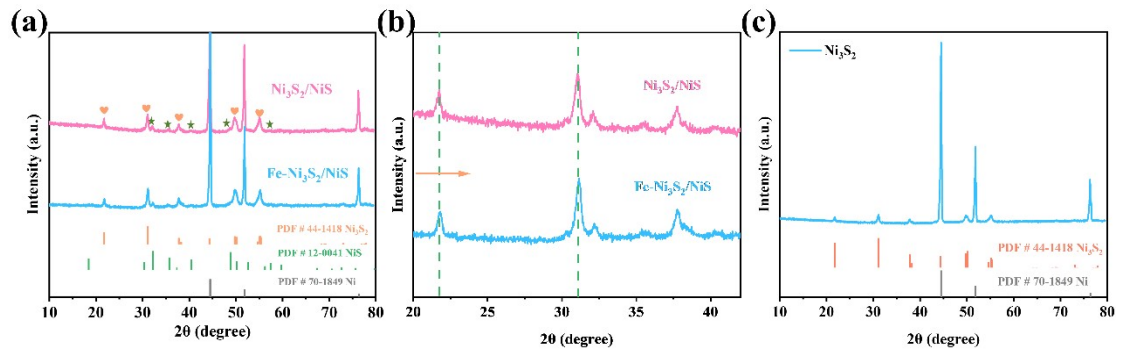

**Fig. S4** (a) The XRD pattern of  $\text{Fe-Ni}_3\text{S}_2/\text{NiS}$  and  $\text{Ni}_3\text{S}_2/\text{NiS}$ . (b) The enlarged XRD plot at  $20\sim 40^\circ$ . (c) The XRD pattern of  $\text{Ni}_3\text{S}_2$ .

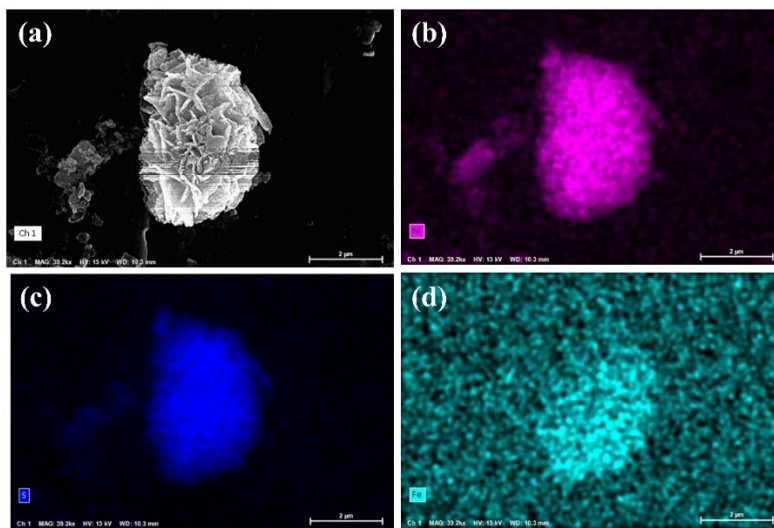

**Fig. S5** The EDS of  $\text{Fe-Ni}_3\text{S}_2/\text{NiS}$  (the catalyst is sonicated from the Nickel foam for testing).

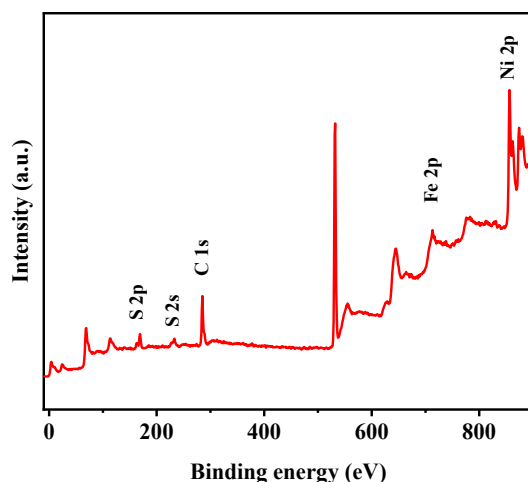

**Fig. S6** The survey XPS spectrum of Fe-Ni<sub>3</sub>S<sub>2</sub>/NiS.

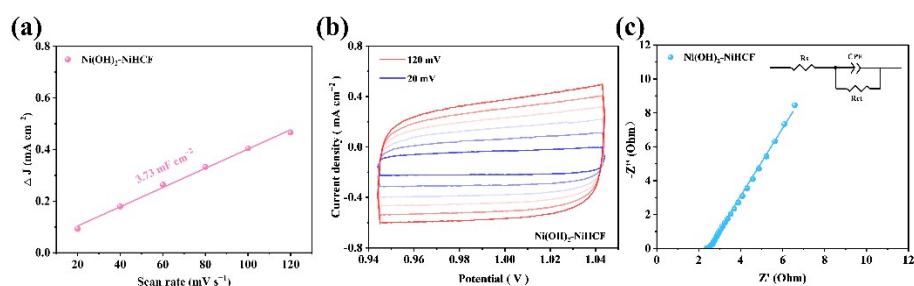

**Fig. S7** (a) The  $C_{dl}$ , (b) CV curve, and (d) EIS of Ni(OH)<sub>2</sub>-NiHCF.

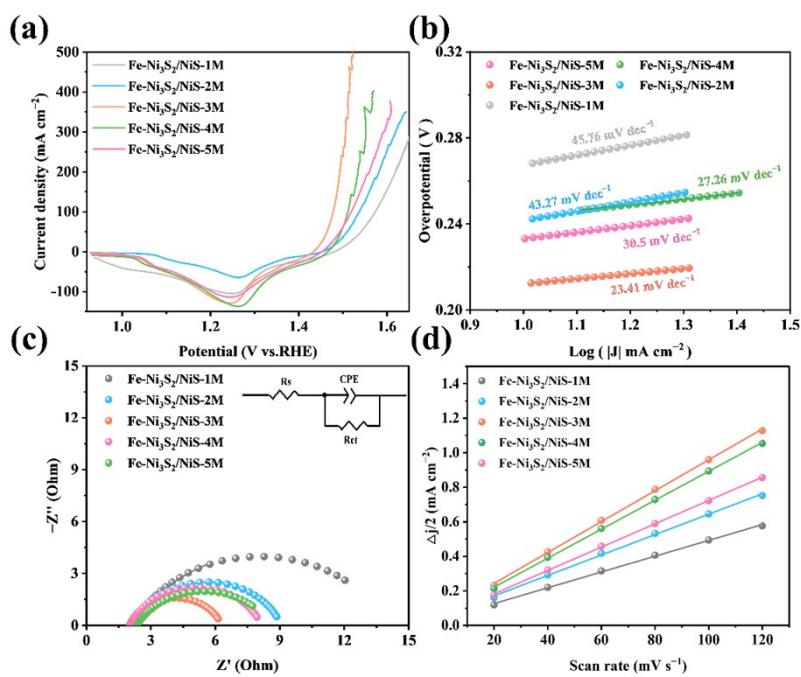

**Fig. S8** (a) LSV, (b)Tafel curve, (c) Nyquist with the fitting curves plotted, and (d)  $C_{dl}$  of different Na<sub>2</sub>S concentration Fe-Ni<sub>3</sub>S<sub>2</sub>/NiS.

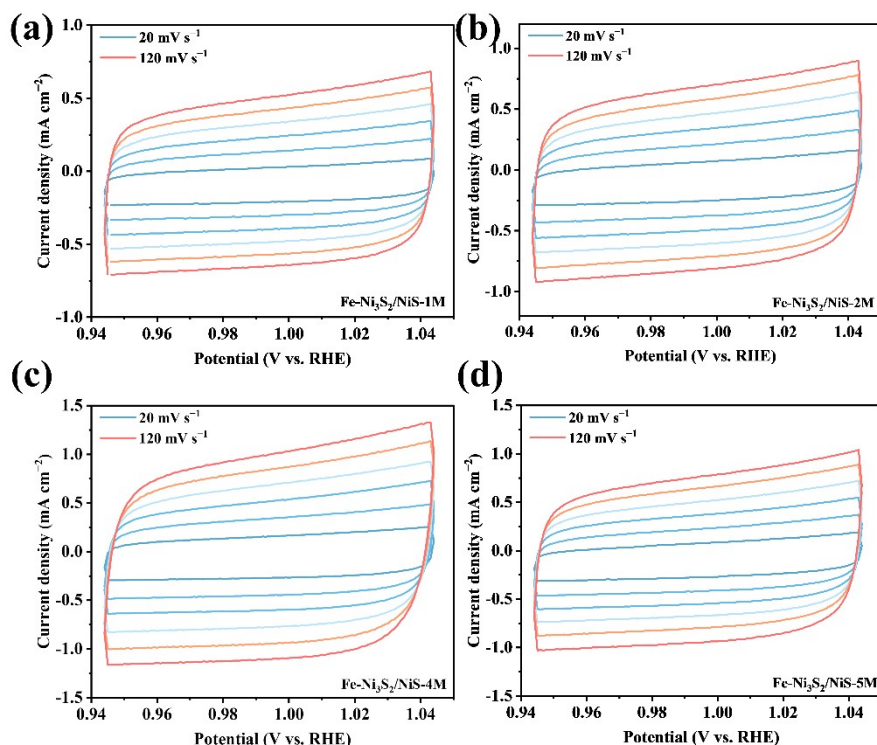

**Fig. S9** The CV curve of different scan rates of (a) Fe-Ni<sub>3</sub>S<sub>2</sub>/NiS-1M, (b) Fe-Ni<sub>3</sub>S<sub>2</sub>/NiS-2M, (c) Fe-Ni<sub>3</sub>S<sub>2</sub>/NiS-4M, and (d) Fe-Ni<sub>3</sub>S<sub>2</sub>/NiS-4M.

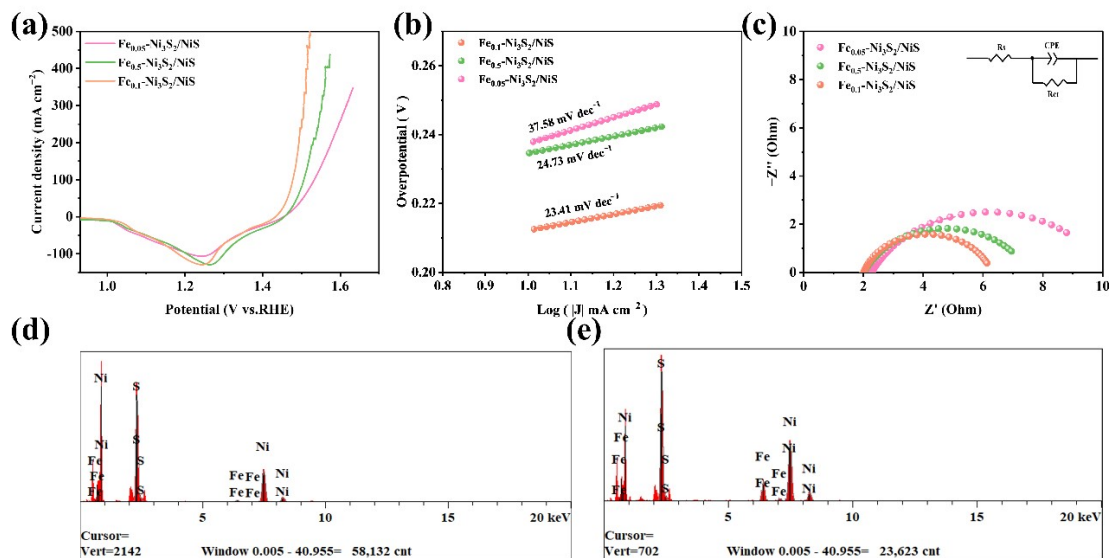

**Fig. S10** (a) IR-corrected polarization curves, (b) Tafel slope, and (c) EIS of Fe<sub>0.05</sub>-Ni<sub>3</sub>S<sub>2</sub>/NiS, Fe<sub>0.5</sub>-Ni<sub>3</sub>S<sub>2</sub>/NiS and Fe-Ni<sub>3</sub>S<sub>2</sub>/NiS. The EDS of (d) Fe<sub>0.05</sub>-Ni<sub>3</sub>S<sub>2</sub>/NiS, (e) Fe<sub>0.5</sub>-Ni<sub>3</sub>S<sub>2</sub>/NiS (the content of element content is shown in Table 1 and 2, respectively).

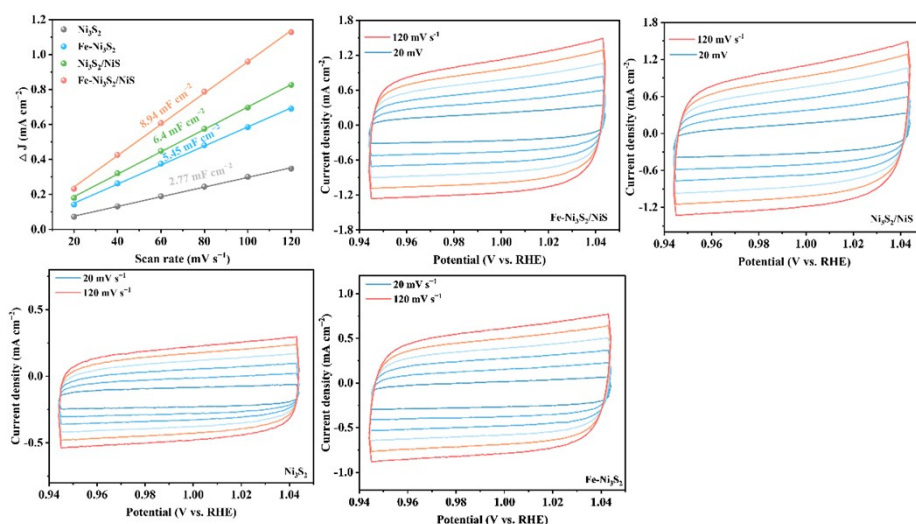

**Fig. S11** (a) The calculated Cdl of  $\text{Ni}_3\text{S}_2$ ,  $\text{Fe-Ni}_3\text{S}_2$ ,  $\text{Ni}_3\text{S}_2/\text{NiS}$  and  $\text{Fe-Ni}_3\text{S}_2/\text{NiS}$ . The CV curves of (b)  $\text{Fe-Ni}_3\text{S}_2/\text{NiS}$ , (c)  $\text{Ni}_3\text{S}_2/\text{NiS}$ , (d)  $\text{Ni}_3\text{S}_2$  and (e)  $\text{Fe-Ni}_3\text{S}_2$  at different scan rates from 20 to  $120 \text{ mV s}^{-1}$ .

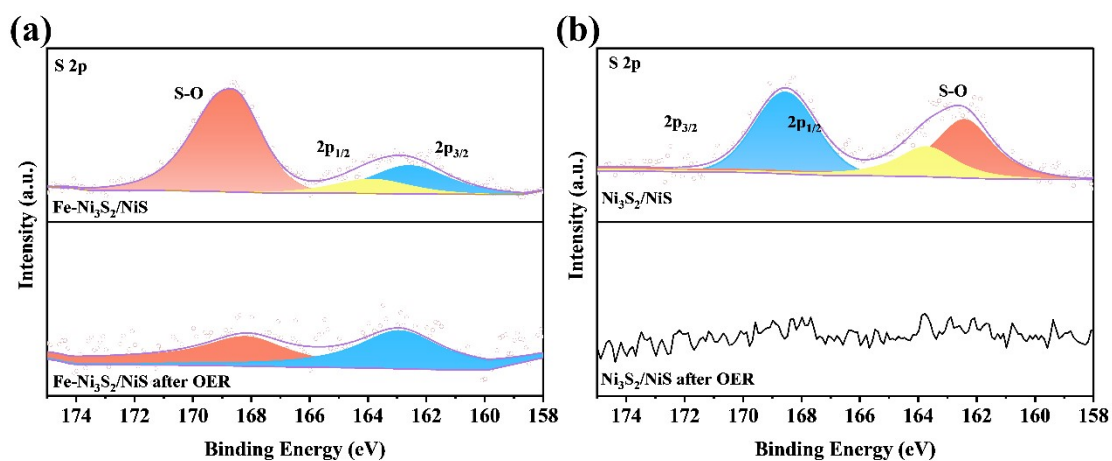

**Fig. S12** The XPS spectrum of S 2p: (a)  $\text{Fe-Ni}_3\text{S}_2/\text{NiS}$  and (b)  $\text{Fe-Ni}_3\text{S}_2$  before and after OER.

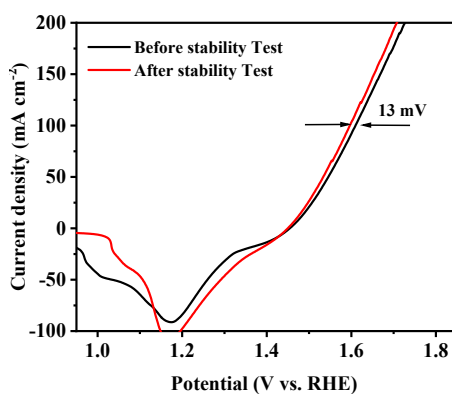

**Fig. S13** The LSV curve was compared initially and after OER stability at  $500 \text{ mA cm}^{-2}$ .

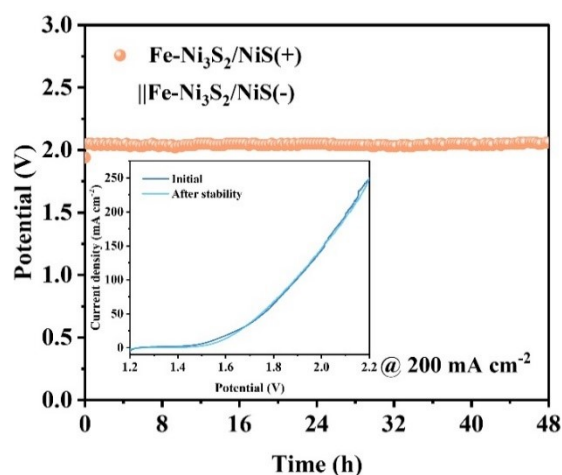

**Fig. S14** Chronopotentiometry measurement uses Fe-Ni<sub>3</sub>S<sub>2</sub>/NiS as the cathode and anode of electrochemical water splitting.

**Table. S1** The element content of Fe<sub>0.05</sub>-Ni<sub>3</sub>S<sub>2</sub>/NiS

| Elt. | Atomic % | Conc.   | Units      |
|------|----------|---------|------------|
| S    | 40.883   | 25.449  | wt.%       |
| Fe   | 1.663    | 1.944   | wt.%       |
| Ni   | 57.454   | 70.607  | wt.%       |
|      | 100.000  | 100.000 | wt.% Total |

**Table. S2** The element content of Fe<sub>0.05</sub>-Ni<sub>3</sub>S<sub>2</sub>/NiS

| Elt. | Atomic % | Conc.   | Units      |
|------|----------|---------|------------|
| S    | 29.510   | 18.724  | wt.%       |
| Fe   | 10.372   | 11.460  | wt.%       |
| Ni   | 60.118   | 69.816  | wt.%       |
|      | 100.000  | 100.000 | wt.% Total |

**Table. S3** The element content of Fe-Ni<sub>3</sub>S<sub>2</sub>/NiS

| Elt. | Atomic % | Conc.   | Units      |
|------|----------|---------|------------|
| S    | 32.02    | 20.94   | wt.%       |
| Fe   | 1.92     | 2.14    | wt.%       |
| Ni   | 66.07    | 77.38   | wt.%       |
|      | 100.000  | 100.000 | wt.% Total |

**Table. S4** The element content of Ni<sub>3</sub>S<sub>2</sub>/NiS after OER

| <b>Elt.</b> | <b>Atomic %</b> | <b>Conc.</b> | <b>Units</b> |       |
|-------------|-----------------|--------------|--------------|-------|
| <b>S</b>    | 0.975           | 0.535        | wt.%         |       |
| <b>Ni</b>   | 99.025          | 99.465       | wt.%         |       |
|             | 100.000         | 100.000      | wt.%         | Total |

- [1] G. Kresse, J. Hafner, Ab initiomolecular dynamics for liquid metals, *Phys. Rev. B.*, 1993, **47**, 558-561.
- [2] G. Kresse, D. Joubert, From ultrasoft pseudopotentials to the projector augmented-wave method, *Phys. Rev. B.*, 1999, **59**, 1758-1775.
- [3] J.P. Perdew, K. Burke, M. Ernzerhof, Generalized gradient approximation made simple, *Phys. Rev. Lett.*, 1996, **77**, 3865-3868.
- [4] Mathew, K.; Sundararaman, R.; Letchworth-Weaver, K.; Arias, T. A.; Hennig, R. G. Implicit solvation model for density-functional study of nanocrystal surfaces and reaction pathways. *J. Chem. Phys.*, 2014, **140**, 084106.
- [5] V. WANG, N. XU, J.-C. LIU, G. TANG, W.-T. GENG, VASPKIT: A user-friendly interface facilitating high-throughput computing and analysis using VASP code, *Comput. Phys. Commun.*, 2021, **267**, 108033.
- [6] X. Xu, S. Zhang, Q. Zhang, S. Chen, Y. Wu and Z. Sun, Fe-doped and carbon composite multiphase hetero-structured catalysts based on the ion-exchange strategy for seawater electrolysis, *ACS Sustainable Chem. Eng.*, 2023, **11**, 15338-15349.
